# Supplementary material for: Heteroplasmic Variants of Mitochondrial DNA in Atherosclerotic Lesions of Human Aortic Intima
Source: MDPI journal article supplement (doi:10.3390/biom9090455), 2019-09-06
Supplement: s1 [file s1]

## MAF values

Table S1: MAF values for heteroplasmic mtDNA variants found in the aortic intimal tissue.

| Sample name | Sample type | Position in mtDNA | MAF   |
|-------------|-------------|-------------------|-------|
| as_1        | FS          | 16092             | 0.031 |
| as_1        | FS          | 16092             | 0.051 |
| as_1        | FS          | 1595              | 0.124 |
| as_1        | N           | 14160             | 0.094 |
| as_1        | FP          | 8116              | 0.273 |
| as_2        | FI          | 11711             | 0.111 |
| as_2        | FI          | 7703              | 0.093 |
| as_2        | FS          | 7703              | 0.167 |
| as_2        | LFP         | 7013              | 0.054 |
| as_2        | LFP         | 152               | 0.1   |
| as_2        | FP          | 7703              | 0.095 |
| as_3        | N           | 152               | 0.132 |
| as_3        | N           | 152               | 0.116 |
| as_3        | N           | 13368             | 0.013 |
| as_3        | FS          | 16126             | 0.017 |
| as_3        | FS          | 152               | 0.157 |
| as_3        | FS          | 16304             | 0.018 |
| as_3        | LFP         | 152               | 0.169 |
| as_3        | LFP         | 152               | 0.136 |
| as_3        | LFP         | 152               | 0.115 |
| as_3        | FP          | 152               | 0.242 |
| as_3        | FP          | 152               | 0.192 |
| as_3        | FP          | 15246             | 0.114 |
| as_3        | FP          | 3849              | 0.105 |
| as_3        | FP          | 152               | 0.175 |
| as_4        | N           | 16304             | 0.061 |
| as_4        | LFP         | 10686             | 0.076 |
| as_4        | LFP         | 152               | 0.147 |
| as_5        | N           | 13722             | 0.144 |
| as_5        | N           | 13722             | 0.113 |
| as_5        | N           | 9935              | 0.077 |
| as_5        | FI          | 13722             | 0.081 |
| as_5        | FI          | 384               | 0.076 |
| as_5        | FI          | 13722             | 0.09  |
| as_5        | FI          | 13722             | 0.098 |
| as_5        | FS          | 13722             | 0.084 |
| as_5        | FS          | 13722             | 0.232 |
| as_5        | LFP         | 13722             | 0.119 |
| as_5        | FP          | 13722             | 0.114 |
| as_5        | FP          | 16294             | 0.116 |
| as_5        | FP          | 13722             | 0.154 |
| as_6        | N           | 11253             | 0.034 |
| as_6        | FI          | 11253             | 0.043 |
| as_6        | FI          | 3915              | 0.043 |
| as_6        | FS          | 16482             | 0.057 |
| as_6        | FS          | 11253             | 0.048 |
| as_6        | FS          | 4727              | 0.069 |
| as_6        | LFP         | 1464              | 0.113 |
| as_6        | FP          | 3915              | 0.043 |
| as_6        | FP          | 11253             | 0.034 |
| as_7        | FI          | 150               | 0.012 |
| as_7        | FI          | 11719             | 0.016 |
| as_7        | FI          | 150               | 0.023 |
| as_7        | LFP         | 7076              | 0.207 |
| as_7        | LFP         | 16129             | 0.217 |
