# Supplementary material for: Heteroplasmic Variants of Mitochondrial DNA in Atherosclerotic Lesions of Human Aortic Intima
Source: MDPI journal article supplement (doi:10.3390/biom9090455), 2019-09-06
Supplement: s1 [file s1]

**Table S2.** Relative mtCN values in the observed tissue samples.

| Case No. (ID) | Sample type | Mean mtCN | SD   | CV, % |
|---------------|-------------|-----------|------|-------|
| as_01         | N           | 1.00      | 0.10 | 9.8   |
| as_01         | FI          | 0.93      | -    | -     |
| as_01         | FS          | 0.66      | 0.04 | 6.5   |
| as_01         | FP          | 0.84      | 0.09 | 10.2  |
| as_01         | LFP         | 0.88      | 0.05 | 5.6   |
| as_02         | N           | 1.00      | 0.24 | 24.3  |
| as_02         | FI          | 0.72      | 0.10 | 13.2  |
| as_02         | FS          | 0.91      | 0.17 | 18.4  |
| as_02         | FP          | 0.76      | 0.14 | 18.7  |
| as_02         | LFP         | 0.60      | 0.07 | 12.1  |
| as_02         | SM          | 20.61     | -    | -     |
| as_02         | MM          | 4.09      | -    | -     |
| as_02         | LIV         | 3.78      | -    | -     |
| as_02         | SPL         | 0.68      | -    | -     |
| as_03         | N           | 1.00      | 0.01 | 0.2   |
| as_03         | FI          | 0.94      | 0.06 | 6.1   |
| as_03         | FS          | 0.80      | 0.07 | 8.5   |
| as_03         | FP          | 0.88      | 0.05 | 5.0   |
| as_03         | LFP         | 0.87      | 0.10 | 11.8  |
| as_03         | SM          | 21.19     | -    | -     |
| as_03         | MM          | 5.00      | -    | -     |
| as_03         | LIV         | 6.89      | -    | -     |
| as_03         | SPL         | 1.04      | -    | -     |
| as_04         | N           | 1.00      | 0.30 | 29.6  |
| as_04         | FI          | 0.60      | 0.16 | 26.9  |
| as_04         | FS          | 0.45      | 0.00 | 0.5   |
| as_04         | FP          | 0.75      | 0.29 | 38.4  |
| as_04         | LFP         | 0.84      | 0.21 | 24.7  |
| as_04         | SM          | 3.79      | -    | -     |
| as_04         | MM          | 3.40      | -    | -     |
| as_04         | LIV         | 2.72      | -    | -     |
| as_04         | SPL         | 0.34      | -    | -     |
| as_05         | N           | 1.00      | 0.44 | 43.8  |
| as_05         | FI          | 0.94      | 0.41 | 44.3  |
| as_05         | FS          | 0.63      | 0.23 | 36.8  |
| as_05         | FP          | 0.67      | 0.04 | 5.7   |
| as_05         | LFP         | 0.67      | 0.25 | 37.6  |
| as_05         | SM          | 10.67     | -    | -     |
| as_05         | MM          | 2.61      | -    | -     |
| as_05         | LIV         | 4.33      | -    | -     |
| as_05         | SPL         | 0.77      | -    | -     |
| as_06         | N           | 1.00      | 0.05 | 5.4   |
| as_06         | FI          | 1.04      | 0.05 | 4.4   |
| as_06         | FS          | 1.21      | 0.25 | 20.5  |

|       |     |       |      |      |
|-------|-----|-------|------|------|
| as_06 | FP  | 1.11  | 0.20 | 17.6 |
| as_06 | LFP | 0.83  | 0.12 | 14.6 |
| as_06 | SM  | 5.81  | -    | -    |
| as_06 | MM  | 10.65 | -    | -    |
| as_06 | LIV | 7.91  | -    | -    |
| as_06 | SPL | 2.78  | -    | -    |
| as_07 | N   | 1.00  | 0.14 | 13.7 |
| as_07 | FI  | 0.94  | 0.11 | 11.5 |
| as_07 | FS  | 0.88  | 0.08 | 9.3  |
| as_07 | FP  | 0.95  | 0.19 | 19.9 |
| as_07 | LFP | 1.13  | 0.06 | 5.1  |
| as_07 | SM  | 3.78  | -    | -    |
| as_07 | MM  | 17.15 | -    | -    |
| as_07 | LIV | 6.94  | -    | -    |
| as_07 | SPL | 0.60  | -    | -    |

---
